# Supplementary material for: Pressure-induced phase transition of 4-aminobenzonitrile: the formation and enhancement of N–H⋯N weak hydrogen bonds
Source: Royal Society of Chemistry journal article supplement (doi:10.1039/c8ra00020d), 2018-01-01
Supplement: c8ra00020d1.pdf [file c8ra00020d1.pdf]

## Supporting Information

# Pressure-induced phase transition of 4-aminobenzonitrile: the formation and enhancement of N-H···N weak hydrogen bonds

*Yuxiang Dai,<sup>a,b</sup> and Yang Qi<sup>\*a,b</sup>*

<sup>a</sup>Institute of Materials Physics and Chemistry, School of Materials Science and Engineering, Northeastern University, Shenyang 110819, China.

<sup>b</sup>Key Laboratory for Anisotropy and Texture of Materials, Ministry of Education, Northeastern University, Shenyang, 110819, China.

\*Email: [qiyang@imp.neu.edu.cn](mailto:qiyang@imp.neu.edu.cn).

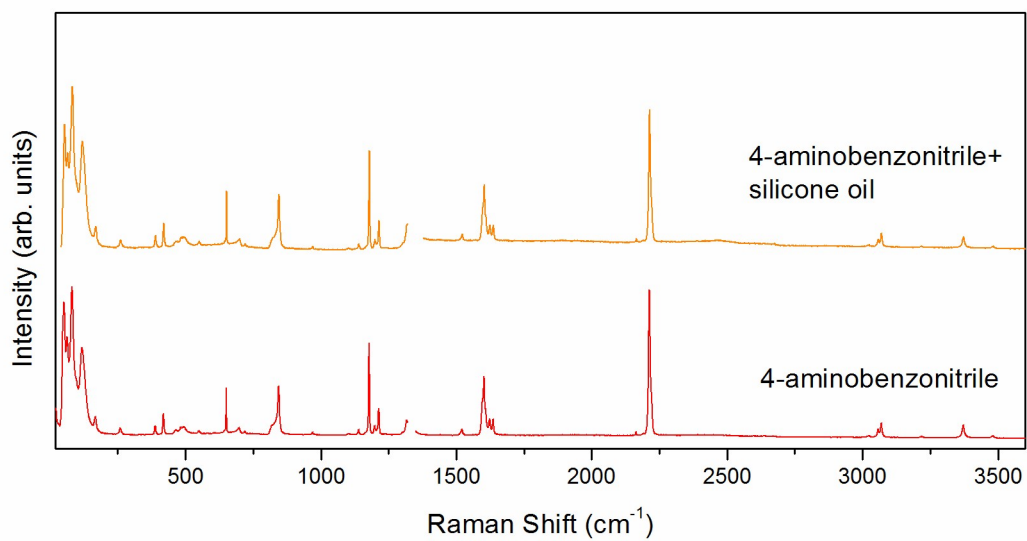

**Fig. S1.** The Raman spectra of 4-aminobenzonitrile and 4-aminobenzonitrile + silicone oil at 1 atm are same.

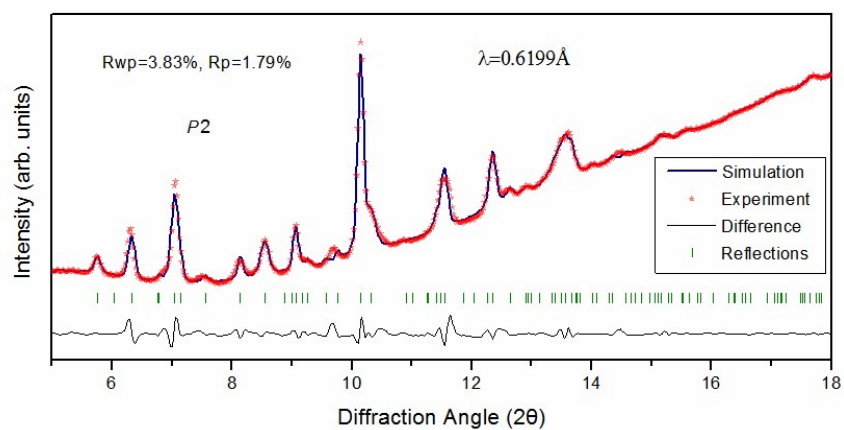

**Fig. S2.** Pawley refinements of the diffraction patterns collected at 1.6 GPa. Solid lines and asterisks represent the simulated and observed profiles, respectively.

**Table S1** Lattice Parameters of 4-aminobenzonitrile at 1.6 GPa

| symmetry   | pressure (GPa) | $a$ (Å) | $b$ (Å)  | $c$ (Å) | $\beta$ (deg) |
|------------|----------------|---------|----------|---------|---------------|
| monoclinic | 1.6            | 6.50(6) | 12.30(9) | 5.91(1) | 107.90(9)     |

**Table S2** Assignment of the Major Raman Bands of 4-Aminobenzonitrile

| Frequency (cm <sup>-1</sup> ) | Assignment                      |
|-------------------------------|---------------------------------|
| 3480                          | NH <sub>2</sub> v <sub>as</sub> |
| 3373                          | NH <sub>2</sub> v <sub>s</sub>  |
| 3070                          | CH stretching                   |
| 3058                          | CH stretching                   |
| 2211                          | C≡N stretching                  |
| 1622                          | NH <sub>2</sub> scissoring      |
| 1601                          | ring C=C stretching             |
| 1519                          | ring C=C stretching             |
| 1436                          | ring C=C stretching             |
| 1334                          | ring C=C stretching             |
| 1314                          | v <sub>s</sub> (ph-N)           |
| 1299                          | ring CH in-plane bending        |
| 1212                          | v <sub>s</sub> (ph-CN)          |
| 1176                          | ring CH in-plane bending        |
| 1138                          | ring CH in-plane bending        |
| 965                           | ring CH out-plane bending       |
| 841                           | ring breathing                  |
| 819                           | ring CH out-plane bending       |
| 718                           | ring CH out-plane def.          |
| 696                           | ring CCin-plane def.            |
| 650                           | ring CCin-plane def.            |
| 547                           | NH <sub>2</sub> wagging         |
| 481                           | NH <sub>2</sub> wagging         |
| 418                           | ring CC in-plane def.           |
| 387                           | ph-N in-plane bending           |

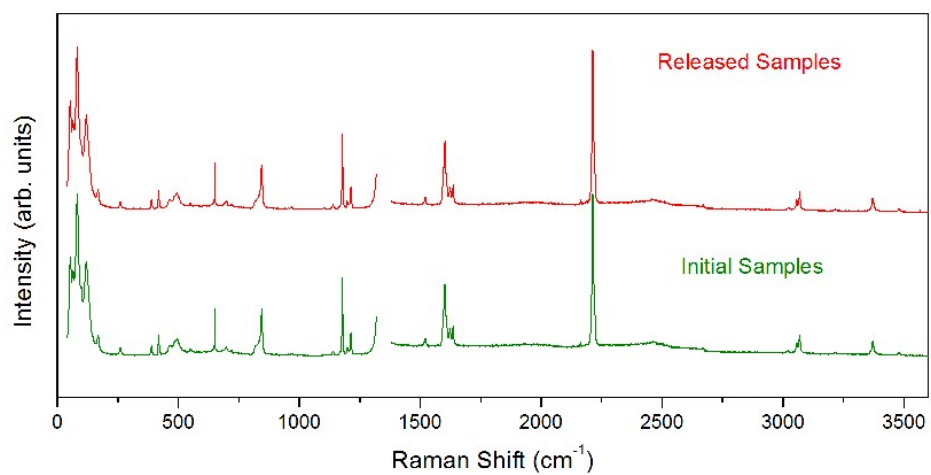

**Fig. S3.** Raman spectra of 4-aminobenzonitrile at 1 atm and the released samples.

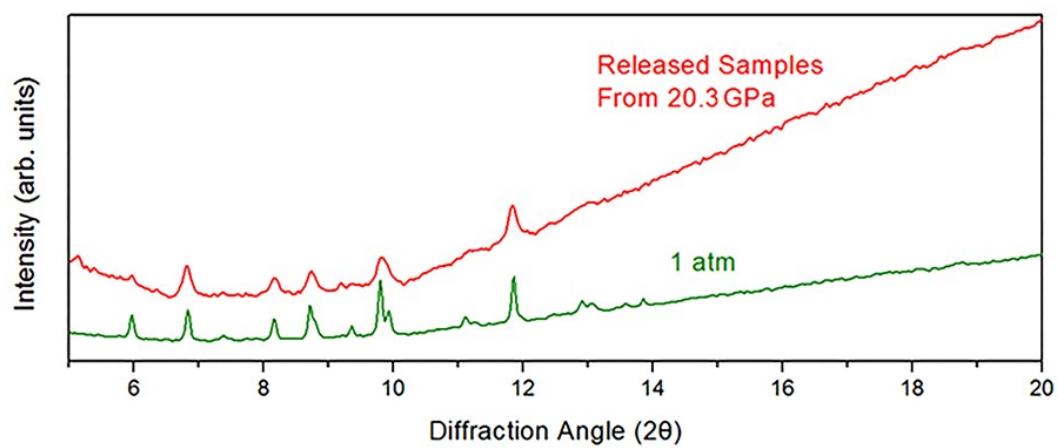

**Fig. S4.** Representative synchrotron XRD patterns of 4-aminobenzonitrile at 1 atm and the released samples from 20.3 GPa.

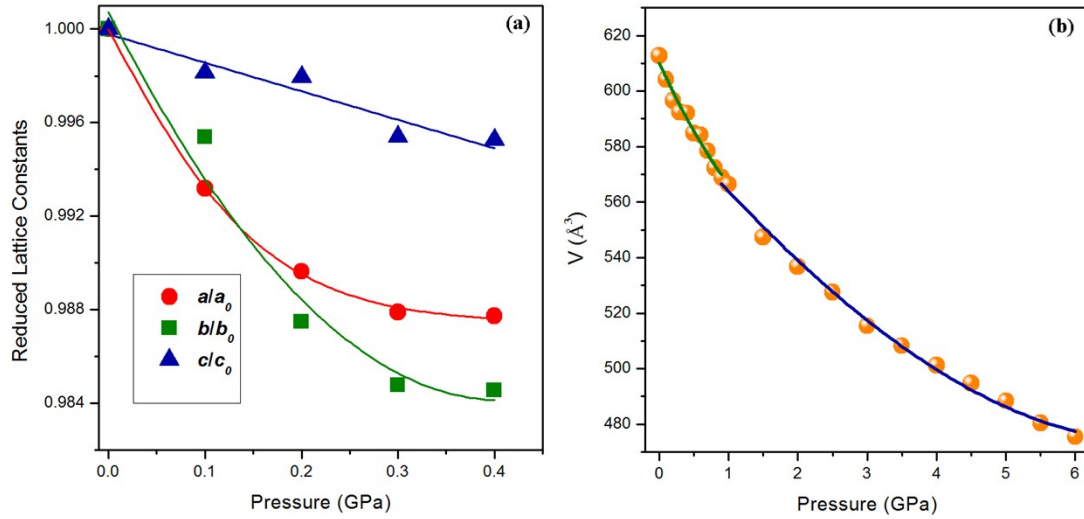

**Fig. S5.** (a) Reduced lattice constants of calculated results, (b) calculated unit cell volume as a function of pressure: The results of the second-order Birch-Murnaghan equation fitting on the calculated unit cell volume by the free online program PASCAL from <http://pascal.chem.ox.ac.uk/>:  $V_0 = 610.33(3) \text{ \AA}^3$ ,  $B_0 = 11.18(1) \text{ GPa}$ ,  $B_0' = 4$  (fixed) (0-0.9 GPa);  $V_0 = 590.43(8) \text{ \AA}^3$ ,  $B_0 = 17.70(7) \text{ GPa}$ ,  $B_0' = 4$  (fixed) (1.0-6.0 GPa).
